# Supplementary material for: Single-step solvothermal synthesis of mesoporous Ag–TiO2–reduced graphene oxide ternary composites with enhanced photocatalytic activity
Source: Royal Society of Chemistry journal article supplement (doi:10.1039/c3nr00579h), 2013-01-01
Supplement: c3nr00579h.pdf [file c3nr00579h.pdf]

Electronic Supplementary Information (ESI):

## Single-Step Solvothermal Synthesis of Mesoporous Ag/TiO<sub>2</sub>/Reduced Graphene Oxide Ternary Composite with Enhanced Photocatalytic Activity

*Md. Selim Arif Sher Shah,<sup>a</sup> Kan Zhang,<sup>b</sup> A Reum Park,<sup>a</sup> Kwang Su Kim,<sup>a</sup> Nam-Gyu Park,<sup>a</sup>*

*Jong Hyeok Park,<sup>ab</sup> and Pil J. Yoo<sup>ab\*</sup>*

<sup>a</sup>School of Chemical Engineering and <sup>b</sup>SKKU Advanced Institute of Nanotechnology (SAINT),

Sungkyunkwan University, Suwon 440-746, Republic of Korea

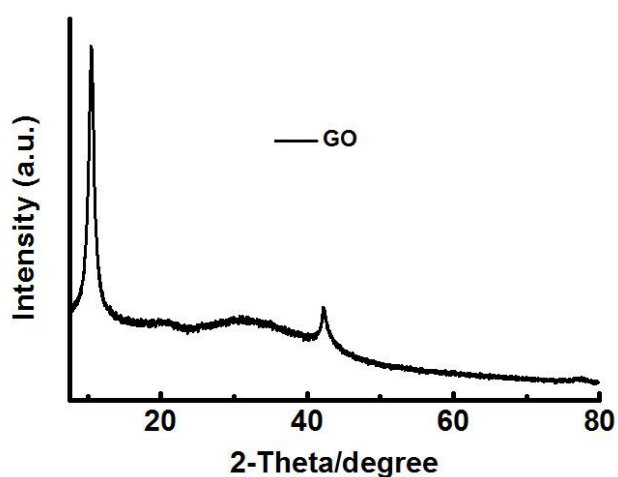

**Figure S1.** X-ray diffractogram of GO.<sup>1</sup>

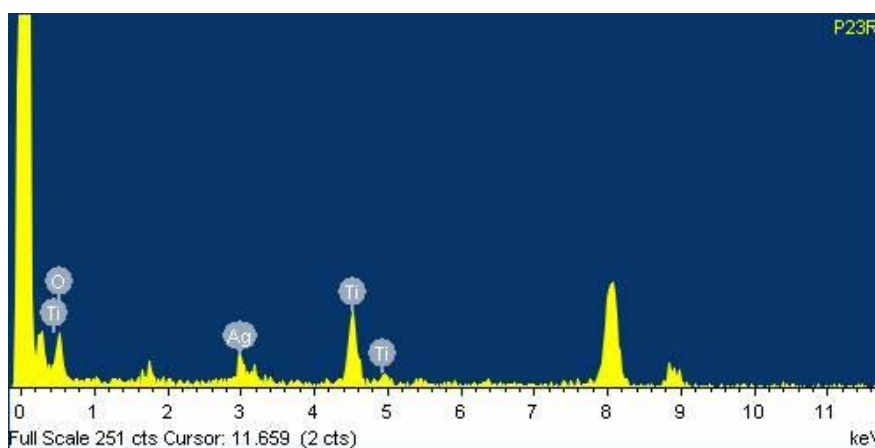

**Figure S2.** EDX spectrum of AgTG 0.50.

**Table S1.** Calculated graphitic domain size for different samples.<sup>2,3</sup>

| Sample    | Graphitic domain size (nm) |
|-----------|----------------------------|
| GO        | 17.0                       |
| RGO       | 15.7                       |
| TG        | 14.6                       |
| AgTG 0.50 | 14.2                       |

**Table S2.** Peak area ratio of oxygen containing groups ( $A_O$ ) to the non-oxygenated groups ( $A_C$ ) and the ratio of total carbon ( $A_{TC}=A_O+A_C$ ) to titanium ( $A_{Ti}$ ) and silver ( $A_{Ag}$ ) in different samples.

| Sample              | $A_O/A_C$ | $A_{TC}/A_{Ti}$ | $A_{TC}/A_{Ag}$ |
|---------------------|-----------|-----------------|-----------------|
| GO                  | 1.21      | -               | -               |
| AgTG 0.25           | 0.54      | 0.40            | 0.24            |
| AgTG 0.25 after use | 0.43      | 0.35            | 0.21            |

Decrease of the ratio  $A_O/A_C$  in AgTG 0.25 after use indicates further reduction of RGO in the sample during photocatalytic experiment. Whereas, the decrease of the ratios  $A_{TC}/A_{Ti}$  and  $A_{TC}/A_{Ag}$  implies the degradation of rGO during the experiment.<sup>2,4</sup>

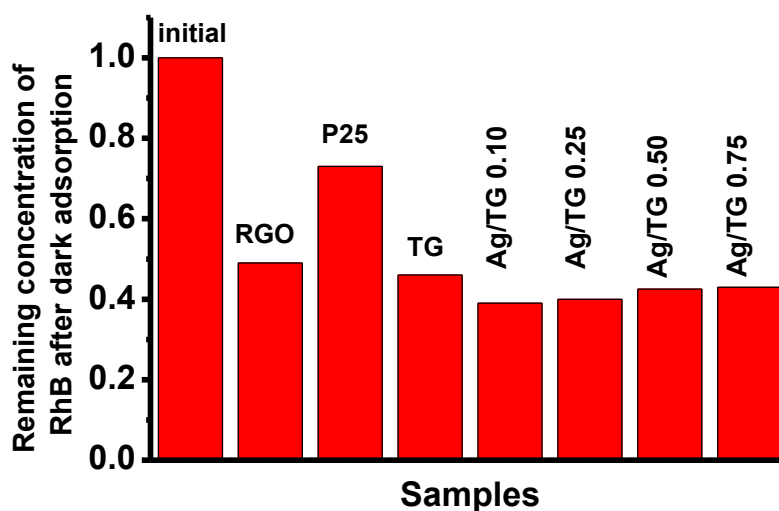

**Figure S3.** Plot of the concentration of the dye remained in solution after dark-adsorption against catalysts.

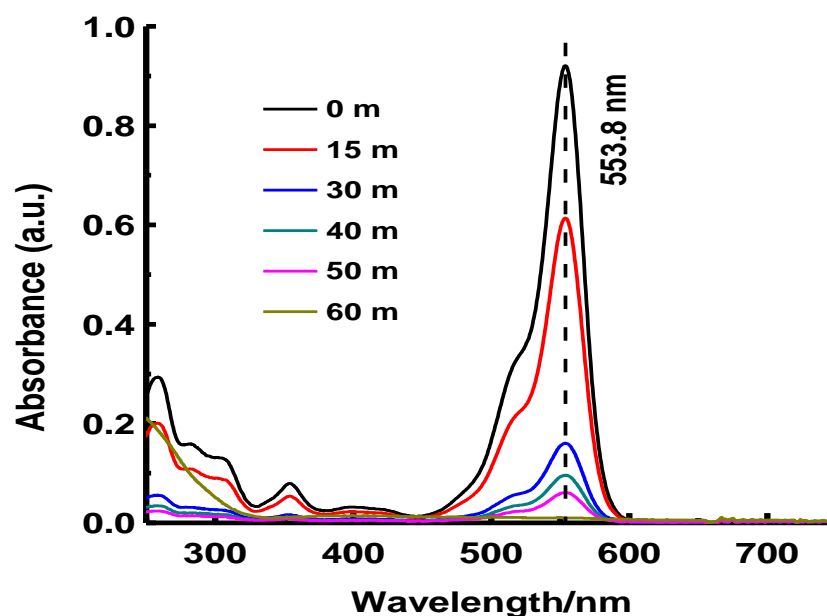

**Figure S4.** UV-visible absorption spectra of the dye at different time during dye degradation experiment.

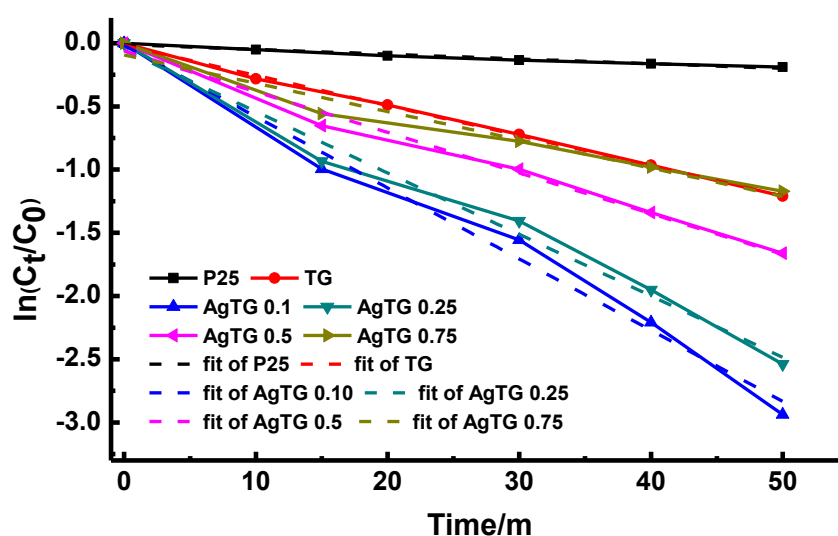

**Figure S5.** Plots of  $\ln(C_t/C_0)$  vs. time for different catalysts. The dotted lines are the corresponding fitting curves. Last point of each curve was not considered.

1. Y. Zhang, N. Zhang, Z. –R. Tang, Y. –J. Xu, *ACS Nano*, 2012, **6**, 9777-9789.
2. Md. S. A. Sher Shah, A. R. Park, K. Zhang, J. H. Park, P. J. Yoo, *ACS Appl. Mater. Interfaces*, **2012**, *4*, 3893–3901.
3. M. Giovanni, H. L. Poh, A. Ambrosi, G. Zhao, Z. Sofer, F. Sanek, B. Khezri, R. D. Webster, M. Pumera, *Nanoscale*, 2012, **4**, 5002-5008.
4. O. Akhavan, M. Abdolabad, A. Esfandiar, M. Mohatashamifar, *J. Phys. Chem. C*, 2010, **114**, 12955–12959.
